# Supplementary material
Source: MDPI journal article supplement (https://www.mdpi.com/2071-1050/14/10/6074)
Supplement: s1 [file s1 › sustainability-1685925-supplementary.pdf]

### Supplementary Materials

Table S1 provides the Section 2.1.1 unpublished interpretive evaluation data.

**Table S1.** Interpretive evaluation guest response data.

| Survey Question: The signs have inspired new ideas about my home garden or landscape. |                       |             |
|---------------------------------------------------------------------------------------|-----------------------|-------------|
| Response Categories                                                                   | Number of Respondents | Percent (%) |
| 1 (strongly disagree)                                                                 | 1                     | 1.8         |
| 2                                                                                     | 0                     | 0           |
| 3                                                                                     | 3                     | 5.6         |
| 4                                                                                     | 9                     | 16.7        |
| 5 (strongly agree)                                                                    | 41                    | 75.9        |
